# Supplementary material for: Efficient exploration of transition-metal decorated MXene for carbon monoxide sensing using integrated active learning and density functional theory
Source: Royal Society of Chemistry journal article supplement (doi:10.1039/d3cp03667g), 2023-01-01
Supplement: d3cp03667g1.pdf [file d3cp03667g1.pdf]

## Supplementary Information

# Efficient Exploration of Transition-Metal Decorated MXene for Carbon Monoxide Sensing Using Integrated Active Learning and Density Functional Theory

Kajjana Boonpalit,<sup>‡,a</sup> Jiramet Kinchagawat,<sup>‡,a</sup> Chanatkran Prommin,<sup>a</sup>  
Sarana Nutanong,<sup>\*,a</sup> and Supawadee Namuangruk<sup>\*,b</sup>

<sup>a</sup>*School of Information Science and Technology, Vidyasirimedhi Institute of Science and Technology (VISTEC), Rayong 21210, Thailand*

<sup>b</sup>*National Nanotechnology Center (NANOTEC), National Science and Technology Development Agency (NSTDA), Klong Luang, Pathum Thani 12120, Thailand*

<sup>‡</sup>*These authors contributed equally to this work.*

<sup>\*</sup>E-mail: snutanon@vistec.ac.th (SN), supawadee@nanotec.or.th (SN)

**Table S1** CO adsorption on pristine MXene

| Surface                                       | $E_{ads}$ (eV) | Surface                                       | $E_{ads}$ (eV) | Surface                                       | $E_{ads}$ (eV) |
|-----------------------------------------------|----------------|-----------------------------------------------|----------------|-----------------------------------------------|----------------|
| Ti <sub>2</sub> CO <sub>2</sub>               | -0.14          | Zr <sub>2</sub> CO <sub>2</sub>               | -0.13          | Hf <sub>2</sub> CO <sub>2</sub>               | -0.14          |
| Ti <sub>3</sub> C <sub>2</sub> O <sub>2</sub> | -0.14          | Zr <sub>3</sub> C <sub>2</sub> O <sub>2</sub> | -0.15          | Hf <sub>3</sub> C <sub>2</sub> O <sub>2</sub> | -0.15          |
| Ti <sub>4</sub> C <sub>3</sub> O <sub>2</sub> | -0.15          | Zr <sub>4</sub> C <sub>3</sub> O <sub>2</sub> | -0.15          | Hf <sub>4</sub> C <sub>3</sub> O <sub>2</sub> | -0.15          |
| Ti <sub>2</sub> CS <sub>2</sub>               | -0.13          | Zr <sub>2</sub> CS <sub>2</sub>               | -0.13          | Hf <sub>2</sub> CS <sub>2</sub>               | -0.13          |
| Ti <sub>3</sub> C <sub>2</sub> S <sub>2</sub> | -0.14          | Zr <sub>3</sub> C <sub>2</sub> S <sub>2</sub> | -0.13          | Hf <sub>3</sub> C <sub>2</sub> S <sub>2</sub> | -0.13          |
| Ti <sub>4</sub> C <sub>3</sub> S <sub>2</sub> | -0.14          | Zr <sub>4</sub> C <sub>3</sub> S <sub>2</sub> | -0.13          | Hf <sub>4</sub> C <sub>3</sub> S <sub>2</sub> | -0.16          |

**Table S2** Pre-computed initial dataset for initializing the active learning screening

| Initial Dataset                                  |        |                |                                                  |        |                |
|--------------------------------------------------|--------|----------------|--------------------------------------------------|--------|----------------|
| Surface                                          | Method | $E_{ads}$ (eV) | Surface                                          | Method | $E_{ads}$ (eV) |
| Fe@Zr <sub>2</sub> CO <sub>2</sub>               | Random | -1.32          | Cu@Ti <sub>3</sub> C <sub>2</sub> O <sub>2</sub> | Random | -1.75          |
| Fe@Hf <sub>3</sub> C <sub>2</sub> O <sub>2</sub> | Random | -1.83          | Os@Ti <sub>3</sub> C <sub>2</sub> O <sub>2</sub> | Random | -2.12          |
| Co@Hf <sub>4</sub> C <sub>3</sub> S <sub>2</sub> | Random | -1.45          | Nb@Ti <sub>3</sub> C <sub>2</sub> S <sub>2</sub> | Random | -1.65          |
| Ta@Ti <sub>3</sub> C <sub>2</sub> O <sub>2</sub> | Random | -1.55          | Ta@Ti <sub>3</sub> C <sub>2</sub> S <sub>2</sub> | Random | -1.97          |
| Fe@Hf <sub>2</sub> CO <sub>2</sub>               | Random | -1.73          | Ru@Ti <sub>4</sub> C <sub>3</sub> O <sub>2</sub> | Random | -1.55          |
| Au@Hf <sub>2</sub> CO <sub>2</sub>               | Random | -1.80          | Nb@Ti <sub>4</sub> C <sub>3</sub> O <sub>2</sub> | Random | -1.54          |
| Ta@Hf <sub>2</sub> CS <sub>2</sub>               | Random | -1.89          | Ta@Ti <sub>4</sub> C <sub>3</sub> S <sub>2</sub> | Random | -1.98          |
| Y@Hf <sub>2</sub> CS <sub>2</sub>                | Random | -0.67          | Ir@Ti <sub>4</sub> C <sub>3</sub> S <sub>2</sub> | Random | -1.46          |
| W@Hf <sub>3</sub> C <sub>2</sub> O <sub>2</sub>  | Random | -1.97          | Ag@Zr <sub>2</sub> CO <sub>2</sub>               | Random | -1.12          |
| Rh@Hf <sub>3</sub> C <sub>2</sub> O <sub>2</sub> | Random | -1.96          | Os@Zr <sub>2</sub> CO <sub>2</sub>               | Random | -2.53          |
| Re@Hf <sub>3</sub> C <sub>2</sub> S <sub>2</sub> | Random | -2.12          | Nb@Zr <sub>2</sub> CS <sub>2</sub>               | Random | -1.54          |
| Mo@Hf <sub>3</sub> C <sub>2</sub> S <sub>2</sub> | Random | -1.81          | Au@Zr <sub>2</sub> CS <sub>2</sub>               | Random | -1.63          |
| Pd@Hf <sub>4</sub> C <sub>3</sub> O <sub>2</sub> | Random | -1.76          | Hf@Zr <sub>3</sub> C <sub>2</sub> O <sub>2</sub> | Random | -1.17          |
| Co@Hf <sub>4</sub> C <sub>3</sub> O <sub>2</sub> | Random | -2.33          | Ni@Zr <sub>3</sub> C <sub>2</sub> O <sub>2</sub> | Random | -1.88          |
| V@Hf <sub>4</sub> C <sub>3</sub> S <sub>2</sub>  | Random | -1.54          | Pt@Zr <sub>3</sub> C <sub>2</sub> S <sub>2</sub> | Random | -1.24          |
| Fe@Hf <sub>4</sub> C <sub>3</sub> S <sub>2</sub> | Random | -1.19          | Ti@Zr <sub>3</sub> C <sub>2</sub> S <sub>2</sub> | Random | -1.21          |
| Ta@Ti <sub>2</sub> CO <sub>2</sub>               | Random | -1.51          | Sc@Zr <sub>4</sub> C <sub>3</sub> O <sub>2</sub> | Random | -0.80          |
| Ti@Ti <sub>2</sub> CO <sub>2</sub>               | Random | -1.08          | Zr@Zr <sub>4</sub> C <sub>3</sub> O <sub>2</sub> | Random | -1.08          |
| Mo@Ti <sub>2</sub> CS <sub>2</sub>               | Random | -1.86          | Ni@Zr <sub>4</sub> C <sub>3</sub> S <sub>2</sub> | Random | -1.23          |
| Mn@Ti <sub>2</sub> CS <sub>2</sub>               | Random | -1.09          | Cr@Zr <sub>4</sub> C <sub>3</sub> S <sub>2</sub> | Random | -1.17          |

**Table S3** Predicted and actual adsorption energy with their value difference of query datapoints at each iteration.

| Iteration 1                                      |         |                           |                          |            | Iteration 2                                      |         |                           |                          |            |
|--------------------------------------------------|---------|---------------------------|--------------------------|------------|--------------------------------------------------|---------|---------------------------|--------------------------|------------|
| Surface                                          | Method  | $E_{\text{ads,DFT}}$ (eV) | $E_{\text{ads,ML}}$ (eV) | Error (eV) | Surface                                          | Method  | $E_{\text{ads,DFT}}$ (eV) | $E_{\text{ads,ML}}$ (eV) | Error (eV) |
| Ag@Hf <sub>2</sub> CO <sub>2</sub>               | Explore | -1.07                     | -1.66                    | 0.59       | Ag@Ti <sub>3</sub> C <sub>2</sub> S <sub>2</sub> | Explore | -1.07                     | -1.63                    | 0.56       |
| Au@Ti <sub>2</sub> CO <sub>2</sub>               | Explore | -2.80                     | -1.32                    | -1.48      | Co@Ti <sub>2</sub> CO <sub>2</sub>               | Explore | -1.68                     | -1.36                    | -0.32      |
| Cr@Ti <sub>2</sub> CO <sub>2</sub>               | Explore | -1.52                     | -1.36                    | -0.16      | Cu@Zr <sub>2</sub> CS <sub>2</sub>               | Explore | -1.06                     | -1.49                    | 0.43       |
| Ir@Zr <sub>2</sub> CO <sub>2</sub>               | Explore | -2.56                     | -1.58                    | -0.98      | Ir@Hf <sub>2</sub> CO <sub>2</sub>               | Explore | -2.76                     | -1.66                    | -1.10      |
| Mn@Ti <sub>2</sub> CO <sub>2</sub>               | Explore | -1.19                     | -1.39                    | 0.20       | Ni@Hf <sub>2</sub> CS <sub>2</sub>               | Explore | -1.35                     | -1.52                    | 0.17       |
| Pt@Hf <sub>2</sub> CO <sub>2</sub>               | Explore | -3.45                     | -1.65                    | -1.80      | Pd@Hf <sub>2</sub> CS <sub>2</sub>               | Explore | -1.20                     | -1.50                    | 0.30       |
| Rh@Zr <sub>4</sub> C <sub>3</sub> O <sub>2</sub> | Explore | -1.96                     | -1.38                    | -0.58      | Pt@Ti <sub>3</sub> CS <sub>2</sub>               | Explore | -2.01                     | -1.65                    | -0.36      |
| Ta@Hf <sub>3</sub> C <sub>2</sub> O <sub>2</sub> | Explore | -1.74                     | -1.66                    | -0.08      | Ta@Hf <sub>3</sub> C <sub>3</sub> O <sub>2</sub> | Explore | -1.77                     | -1.64                    | -0.13      |
| V@Hf <sub>2</sub> CO <sub>2</sub>                | Explore | -1.39                     | -1.66                    | 0.27       | Ti@Hf <sub>2</sub> CO <sub>2</sub>               | Explore | -1.28                     | -1.69                    | 0.41       |
| Zr@Zr <sub>2</sub> CO <sub>2</sub>               | Explore | -1.17                     | -1.56                    | 0.39       | W@Zr <sub>2</sub> CS <sub>2</sub>                | Explore | -2.13                     | -1.51                    | -0.62      |
| Explore RMSE = 0.8586 eV                         |         | Exploit RMSE = N/A        |                          |            | Explore RMSE = 0.5127 eV                         |         | Exploit RMSE = N/A        |                          |            |
| Iteration 3                                      |         |                           |                          |            | Iteration 4                                      |         |                           |                          |            |
| Surface                                          | Method  | $E_{\text{ads,DFT}}$ (eV) | $E_{\text{ads,ML}}$ (eV) | Error (eV) | Surface                                          | Method  | $E_{\text{ads,DFT}}$ (eV) | $E_{\text{ads,ML}}$ (eV) | Error (eV) |
| Au@Hf <sub>2</sub> CS <sub>2</sub>               | Explore | -1.84                     | -1.31                    | -0.53      | Pt@Hf <sub>3</sub> C <sub>2</sub> O <sub>2</sub> | Explore | -3.37                     | -2.80                    | -0.57      |
| Au@Ti <sub>3</sub> CS <sub>2</sub>               | Explore | -1.82                     | -1.62                    | -0.20      | Sc@Hf <sub>2</sub> CO <sub>2</sub>               | Explore | -1.06                     | -0.45                    | -0.61      |
| Ir@Ti <sub>2</sub> CO <sub>2</sub>               | Explore | -2.81                     | -1.61                    | -1.20      | Sc@Hf <sub>3</sub> C <sub>2</sub> O <sub>2</sub> | Explore | -0.93                     | -1.06                    | 0.13       |
| Pd@Hf <sub>2</sub> CO <sub>2</sub>               | Explore | -1.76                     | -1.78                    | 0.02       | Sc@Ti <sub>2</sub> CO <sub>2</sub>               | Explore | -0.75                     | -0.32                    | -0.43      |
| Pd@Zr <sub>2</sub> CS <sub>2</sub>               | Explore | -1.13                     | -1.41                    | 0.28       | Sc@Zr <sub>2</sub> CO <sub>2</sub>               | Explore | -0.93                     | -0.29                    | -0.64      |
| Pt@Hf <sub>2</sub> CS <sub>2</sub>               | Explore | -1.49                     | -1.59                    | 0.10       | Sc@Ti <sub>3</sub> C <sub>2</sub> O <sub>2</sub> | Exploit | -0.71                     | -0.78                    | 0.07       |
| Pt@Hf <sub>3</sub> C <sub>2</sub> S <sub>2</sub> | Explore | -1.34                     | -1.60                    | 0.26       | Sc@Zr <sub>3</sub> C <sub>2</sub> S <sub>2</sub> | Exploit | -0.75                     | -0.78                    | 0.03       |
| Pt@Ti <sub>3</sub> C <sub>2</sub> S <sub>2</sub> | Explore | -1.97                     | -2.07                    | 0.10       | Y@Zr <sub>2</sub> CS <sub>2</sub>                | Exploit | -0.65                     | -0.73                    | 0.08       |
| Pt@Zr <sub>2</sub> CS <sub>2</sub>               | Explore | -1.38                     | -1.79                    | 0.41       | Y@Zr <sub>3</sub> C <sub>2</sub> O <sub>2</sub>  | Exploit | -0.72                     | -0.67                    | -0.05      |
| Sc@Ti <sub>2</sub> CS <sub>2</sub>               | Explore | -0.77                     | -1.57                    | 0.80       | Y@Zr <sub>4</sub> C <sub>3</sub> O <sub>2</sub>  | Exploit | -0.70                     | -0.76                    | 0.06       |
| Explore RMSE = 0.5230 eV                         |         | Exploit RMSE = N/A        |                          |            | Explore RMSE = 0.5115 eV                         |         | Exploit RMSE = 0.0605 eV  |                          |            |
| Iteration 5                                      |         |                           |                          |            | Iteration 6                                      |         |                           |                          |            |
| Surface                                          | Method  | $E_{\text{ads,DFT}}$ (eV) | $E_{\text{ads,ML}}$ (eV) | Error (eV) | Surface                                          | Method  | $E_{\text{ads,DFT}}$ (eV) | $E_{\text{ads,ML}}$ (eV) | Error (eV) |
| Fe@Zr <sub>4</sub> C <sub>3</sub> S <sub>2</sub> | Exploit | -1.15                     | -0.78                    | -0.37      | Sc@Hf <sub>3</sub> C <sub>3</sub> S <sub>2</sub> | Exploit | -0.76                     | -0.89                    | 0.13       |
| Sc@Hf <sub>2</sub> CS <sub>2</sub>               | Exploit | -0.78                     | -0.78                    | 0.00       | Sc@Ti <sub>4</sub> C <sub>3</sub> O <sub>2</sub> | Exploit | -0.71                     | -0.78                    | 0.07       |
| Sc@Zr <sub>2</sub> CS <sub>2</sub>               | Exploit | -0.76                     | -0.67                    | -0.09      | Ti@Zr <sub>2</sub> CO <sub>2</sub>               | Exploit | -1.22                     | -0.93                    | -0.29      |
| Sc@Zr <sub>3</sub> C <sub>2</sub> O <sub>2</sub> | Exploit | -0.80                     | -0.67                    | -0.13      | Y@Hf <sub>3</sub> C <sub>2</sub> O <sub>2</sub>  | Exploit | -0.85                     | -0.89                    | 0.04       |
| Sc@Zr <sub>4</sub> C <sub>3</sub> S <sub>2</sub> | Exploit | -0.74                     | -0.67                    | -0.07      | Y@Hf <sub>3</sub> C <sub>2</sub> S <sub>2</sub>  | Exploit | -0.65                     | -0.76                    | 0.11       |
| Y@Hf <sub>4</sub> C <sub>3</sub> S <sub>2</sub>  | Exploit | -0.64                     | -0.80                    | 0.16       | Y@Hf <sub>4</sub> C <sub>3</sub> O <sub>2</sub>  | Exploit | -0.80                     | -0.93                    | 0.13       |
| Y@Ti <sub>2</sub> CO <sub>2</sub>                | Exploit | -0.67                     | -0.62                    | -0.05      | Y@Ti <sub>2</sub> CS <sub>2</sub>                | Exploit | -0.67                     | -0.64                    | -0.03      |
| Y@Ti <sub>3</sub> C <sub>2</sub> O <sub>2</sub>  | Exploit | -0.61                     | -0.64                    | 0.03       | Y@Ti <sub>3</sub> C <sub>2</sub> S <sub>2</sub>  | Exploit | -0.66                     | -0.82                    | 0.16       |
| Y@Ti <sub>4</sub> C <sub>3</sub> O <sub>2</sub>  | Exploit | -0.60                     | -0.80                    | 0.20       | Y@Zr <sub>3</sub> C <sub>2</sub> S <sub>2</sub>  | Exploit | -0.63                     | -0.58                    | -0.05      |
| Y@Zr <sub>2</sub> CO <sub>2</sub>                | Exploit | -0.86                     | -0.70                    | -0.16      | Y@Zr <sub>4</sub> C <sub>3</sub> S <sub>2</sub>  | Exploit | -0.63                     | -0.63                    | 0.00       |
| Explore RMSE = N/A                               |         | Exploit RMSE = 0.1617 eV  |                          |            | Explore RMSE = N/A                               |         | Exploit RMSE = 0.1286 eV  |                          |            |

| <b>Iteration 7</b>                               |               |                                 |                                |                   |
|--------------------------------------------------|---------------|---------------------------------|--------------------------------|-------------------|
| <b>Surface</b>                                   | <b>Method</b> | <b>E<sub>ads,DFT</sub> (eV)</b> | <b>E<sub>ads,ML</sub> (eV)</b> | <b>Error (eV)</b> |
| Ag@Ti <sub>2</sub> CS <sub>2</sub>               | Exploit       | -1.06                           | -1.04                          | -0.02             |
| Ag@Zr <sub>3</sub> C <sub>2</sub> S <sub>2</sub> | Exploit       | -1.04                           | -1.10                          | 0.06              |
| Ag@Zr <sub>4</sub> C <sub>3</sub> S <sub>2</sub> | Exploit       | -1.05                           | -1.05                          | 0.00              |
| Fe@Ti <sub>3</sub> C <sub>2</sub> S <sub>2</sub> | Exploit       | -1.43                           | -1.10                          | -0.33             |
| Sc@Hf <sub>3</sub> C <sub>2</sub> S <sub>2</sub> | Exploit       | -0.76                           | -0.84                          | 0.08              |
| Sc@Hf <sub>4</sub> C <sub>3</sub> O <sub>2</sub> | Exploit       | -0.89                           | -0.97                          | 0.08              |
| Sc@Ti <sub>3</sub> C <sub>2</sub> S <sub>2</sub> | Exploit       | -0.77                           | -0.80                          | 0.03              |
| Sc@Ti <sub>4</sub> C <sub>3</sub> S <sub>2</sub> | Exploit       | -0.78                           | -1.00                          | 0.22              |
| Y@Hf <sub>2</sub> CO <sub>2</sub>                | Exploit       | -1.04                           | -1.03                          | -0.01             |
| Y@Ti <sub>4</sub> C <sub>3</sub> S <sub>2</sub>  | Exploit       | -0.67                           | -0.81                          | 0.14              |
| Explore RMSE = N/A                               |               | Exploit RMSE = 0.1395 eV        |                                |                   |

**Table S4** Summary of candidates having adsorption energy between -0.6 and -0.8 eV. The distance between the anchored-TM atom and the C atom of CO ( $d(\text{TM-C})$ ), CO adsorption energy ( $E_{ads}$ ), recovery time ( $\tau$ ) calculated at 300 K, formation energy ( $E_f$ ), and charge transfer ( $\Delta q$ ) are listed.

| No | Surface                                          | Iteration | Method  | $E_{ads}$ (eV) | $\tau$ (s) | $E_f$ (eV) | $\Delta q$ (e-) |
|----|--------------------------------------------------|-----------|---------|----------------|------------|------------|-----------------|
| 1  | Y@Hf <sub>4</sub> C <sub>3</sub> O <sub>2</sub>  | 6         | Exploit | -0.80          | 27.24      | -1.89      | -0.29           |
| 2  | Y@Zr <sub>3</sub> C <sub>2</sub> O <sub>2</sub>  | 4         | Exploit | -0.72          | 1.24       | -1.73      | -0.25           |
| 3  | Y@Ti <sub>2</sub> CO <sub>2</sub>                | 5         | Exploit | -0.67          | 0.18       | -2.53      | -0.22           |
| 4  | Y@Zr <sub>4</sub> C <sub>3</sub> O <sub>2</sub>  | 4         | Exploit | -0.70          | 0.57       | -2.82      | -0.22           |
| 5  | Sc@Zr <sub>3</sub> C <sub>2</sub> O <sub>2</sub> | 5         | Exploit | -0.80          | 27.24      | -1.49      | -0.18           |
| 6  | Sc@Zr <sub>4</sub> C <sub>3</sub> O <sub>2</sub> | 0         | Random  | -0.80          | 27.24      | -2.55      | -0.18           |
| 7  | Y@Ti <sub>3</sub> C <sub>2</sub> O <sub>2</sub>  | 5         | Exploit | -0.61          | 0.02       | -4.63      | -0.15           |
| 8  | Sc@Ti <sub>2</sub> CO <sub>2</sub>               | 4         | Explore | -0.75          | 3.94       | -2.29      | -0.15           |
| 9  | Y@Ti <sub>4</sub> C <sub>3</sub> O <sub>2</sub>  | 5         | Exploit | -0.60          | 0.01       | -3.40      | -0.14           |
| 10 | Y@Ti <sub>3</sub> C <sub>2</sub> S <sub>2</sub>  | 6         | Exploit | -0.66          | 0.12       | -3.02      | -0.12           |
| 11 | Sc@Ti <sub>3</sub> C <sub>2</sub> O <sub>2</sub> | 4         | Exploit | -0.71          | 0.84       | -4.38      | -0.12           |
| 12 | Y@Ti <sub>2</sub> CS <sub>2</sub>                | 6         | Exploit | -0.67          | 0.18       | -2.83      | -0.12           |
| 13 | Sc@Ti <sub>2</sub> CS <sub>2</sub>               | 3         | Explore | -0.77          | 8.54       | -2.61      | -0.10           |
| 14 | Sc@Ti <sub>3</sub> C <sub>2</sub> S <sub>2</sub> | 7         | Exploit | -0.77          | 8.54       | -2.81      | -0.09           |
| 15 | Y@Ti <sub>4</sub> C <sub>3</sub> S <sub>2</sub>  | 7         | Exploit | -0.67          | 0.18       | -2.98      | -0.09           |
| 16 | Y@Hf <sub>2</sub> CS <sub>2</sub>                | 0         | Random  | -0.67          | 0.18       | -3.12      | -0.09           |
| 17 | Sc@Ti <sub>4</sub> C <sub>3</sub> O <sub>2</sub> | 6         | Exploit | -0.71          | 0.84       | -3.11      | -0.07           |
| 18 | Sc@Ti <sub>4</sub> C <sub>3</sub> S <sub>2</sub> | 7         | Exploit | -0.78          | 12.57      | -2.75      | -0.07           |
| 19 | Y@Hf <sub>3</sub> C <sub>2</sub> S <sub>2</sub>  | 6         | Exploit | -0.65          | 0.08       | -3.26      | -0.07           |
| 20 | Y@Hf <sub>4</sub> C <sub>3</sub> S <sub>2</sub>  | 5         | Exploit | -0.64          | 0.06       | -3.61      | -0.07           |
| 21 | Sc@Hf <sub>2</sub> CS <sub>2</sub>               | 5         | Exploit | -0.78          | 12.57      | -2.83      | -0.07           |
| 22 | Sc@Hf <sub>3</sub> C <sub>2</sub> S <sub>2</sub> | 7         | Exploit | -0.76          | 5.80       | -2.97      | -0.05           |
| 23 | Y@Zr <sub>4</sub> C <sub>3</sub> S <sub>2</sub>  | 6         | Exploit | -0.63          | 0.04       | -3.78      | -0.05           |
| 24 | Y@Zr <sub>2</sub> CS <sub>2</sub>                | 4         | Exploit | -0.65          | 0.08       | -3.75      | -0.05           |
| 25 | Sc@Hf <sub>4</sub> C <sub>3</sub> S <sub>2</sub> | 6         | Exploit | -0.76          | 5.80       | -3.33      | -0.05           |
| 26 | Sc@Zr <sub>2</sub> CS <sub>2</sub>               | 5         | Exploit | -0.76          | 5.80       | -3.43      | -0.04           |
| 27 | Y@Zr <sub>3</sub> C <sub>2</sub> S <sub>2</sub>  | 6         | Exploit | -0.63          | 0.04       | -3.73      | -0.03           |
| 28 | Sc@Zr <sub>4</sub> C <sub>3</sub> S <sub>2</sub> | 5         | Exploit | -0.74          | 2.68       | -3.48      | -0.03           |
| 29 | Sc@Zr <sub>3</sub> C <sub>2</sub> S <sub>2</sub> | 4         | Exploit | -0.75          | 3.94       | -3.41      | -0.02           |

**Table S5.** The example of the CO adsorption energy at different kinetic energy cutoff. The structure is sampled from different type of decorated transition metal and MXene.

| Surface                                          | CO adsorption energy (eV) |        |        |        |
|--------------------------------------------------|---------------------------|--------|--------|--------|
|                                                  | 400 eV                    | 450 eV | 500 eV | 550 eV |
| Sc@Zr <sub>3</sub> C <sub>2</sub> O <sub>2</sub> | -0.84                     | -0.80  | -0.80  | -0.81  |
| Y@Zr <sub>3</sub> C <sub>2</sub> O <sub>2</sub>  | -0.74                     | -0.72  | -0.73  | -0.72  |
| Ag@Ti <sub>2</sub> CS <sub>2</sub>               | -1.08                     | -1.06  | -1.05  | -1.06  |
| Pd@Hf <sub>4</sub> C <sub>3</sub> O <sub>2</sub> | -1.79                     | -1.76  | -1.75  | -1.76  |

**Table S6.** The hyperparameter, total number of fitting parameter, and the average RMSE of test set from five different seeds. The hyperparameter optimization is done on initial dataset. The training set, validation set, and test set ratio are 0.8:0.1:0.1 in hyperparameter optimization.

| Batch Size | Learning Rate | # Convolution Layer | Number of fitting parameter | Test set RMSE (eV) |
|------------|---------------|---------------------|-----------------------------|--------------------|
| 4          | 0.00003       | 2                   | 58433                       | 0.3668             |
| 4          | 0.00003       | 4                   | 102465                      | 0.3575             |
| 4          | 0.00003       | 6                   | 146497                      | 0.3862             |
| 4          | 0.0003        | 2                   | 58433                       | 0.3294             |
| 4          | 0.0003        | 4                   | 102465                      | 0.3225             |
| 4          | 0.0003        | 6                   | 146497                      | 0.3273             |
| 4          | 0.003         | 2                   | 58433                       | 0.3377             |
| 4          | 0.003         | 4                   | 102465                      | 0.3529             |
| 4          | 0.003         | 6                   | 146497                      | 0.3852             |
| 8          | 0.00003       | 2                   | 58433                       | 0.3627             |
| 8          | 0.00003       | 4                   | 102465                      | 0.3696             |
| 8          | 0.00003       | 6                   | 146497                      | 0.3556             |
| 8          | 0.0003        | 2                   | 58433                       | 0.3617             |
| 8          | 0.0003        | 4                   | 102465                      | 0.3212             |
| 8          | 0.0003        | 6                   | 146497                      | 0.3637             |
| 8          | 0.003         | 2                   | 58433                       | 0.3832             |
| 8          | 0.003         | 4                   | 102465                      | 0.3329             |
| 8          | 0.003         | 6                   | 146497                      | 0.3494             |
| 16         | 0.00003       | 2                   | 58433                       | 0.3433             |
| 16         | 0.00003       | 4                   | 102465                      | 0.3744             |
| 16         | 0.00003       | 6                   | 146497                      | 0.3073             |
| 16         | 0.0003        | 2                   | 58433                       | 0.3641             |
| 16         | 0.0003        | 4                   | 102465                      | 0.3634             |
| <b>16</b>  | <b>0.0003</b> | <b>6</b>            | <b>146497</b>               | <b>0.3062</b>      |
| 16         | 0.003         | 2                   | 58433                       | 0.3655             |
| 16         | 0.003         | 4                   | 102465                      | 0.3567             |
| 16         | 0.003         | 6                   | 146497                      | 0.4034             |

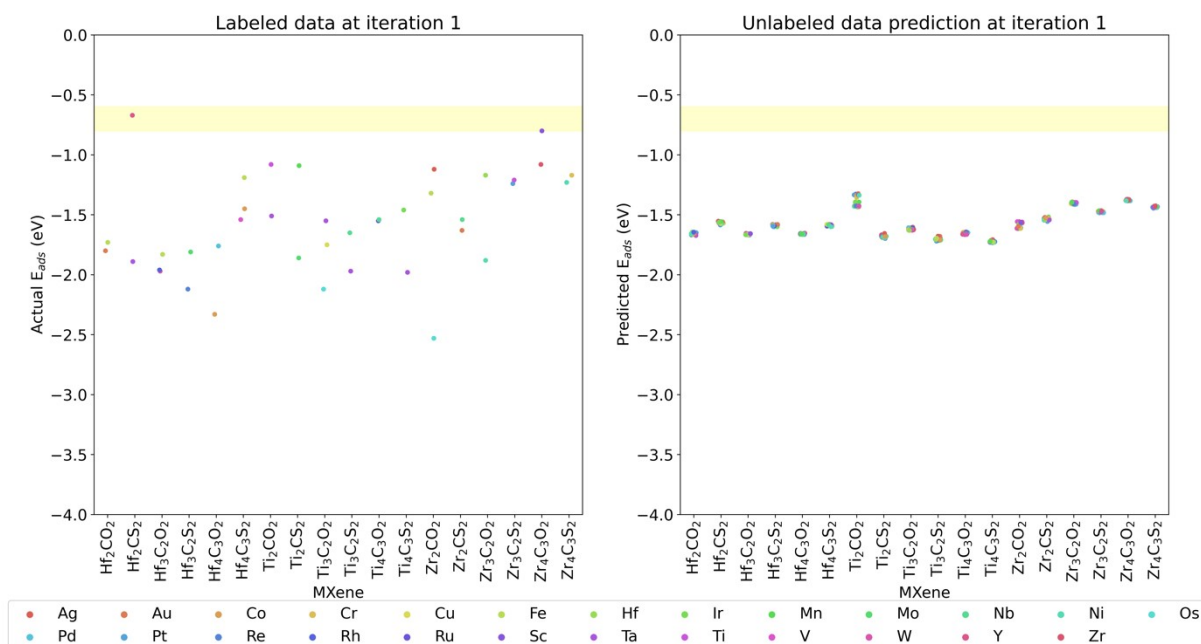

**Fig. S1** Actual adsorption energy of labeled datapoints and predicted adsorption energy of unlabeled datapoints at iteration 1. The yellow shaded area represents the target adsorption energy range of -0.6 to -0.8 eV.

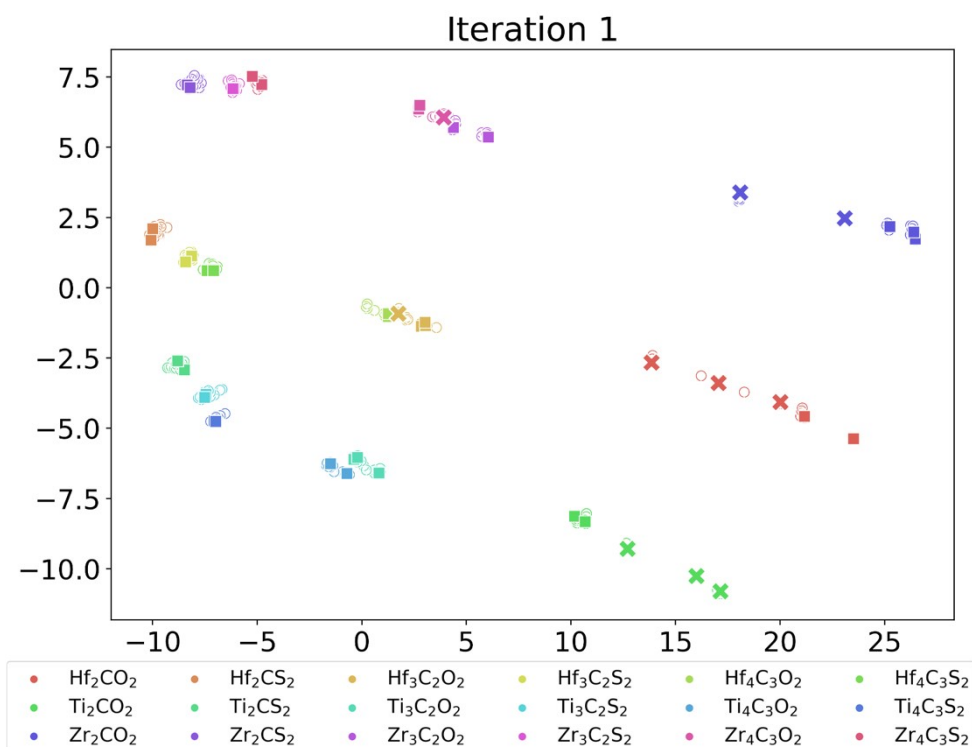

**Fig. S2** mMDS of embedding after training of surrogate model at iteration 1. Circles denote unlabeled data, squares denote labeled data, and crosses denote queried data by K-Center

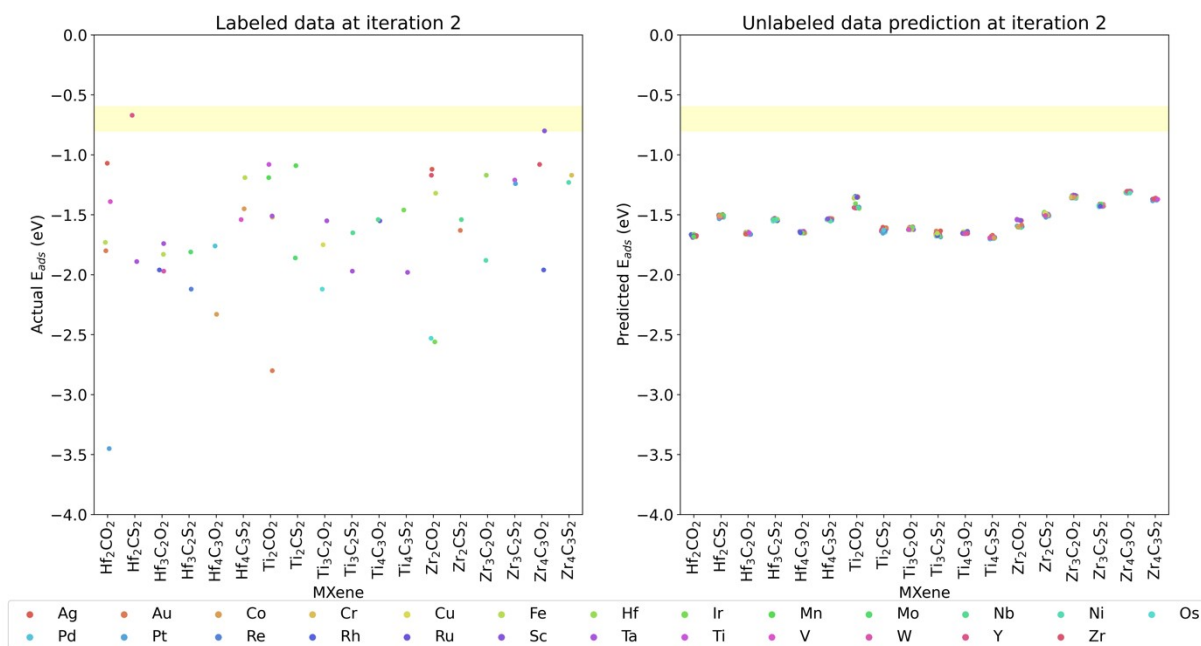

**Fig. S3** Actual adsorption energy of labeled datapoints and predicted adsorption energy of unlabeled datapoints at iteration 2. The yellow shaded area represents the target adsorption energy range of -0.6 to -0.8 eV.

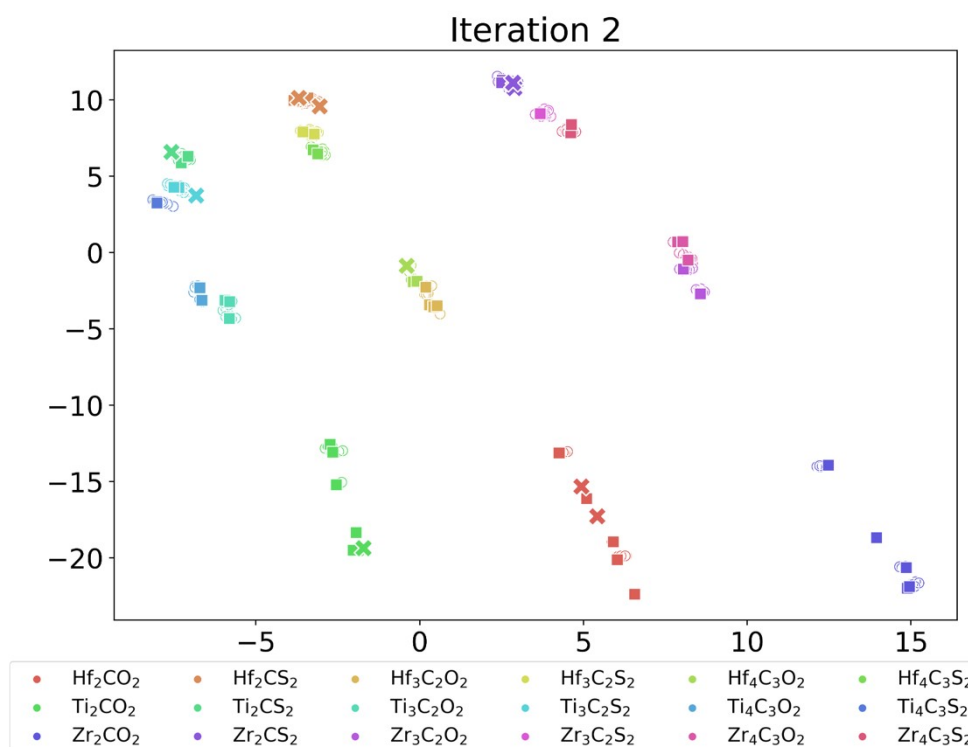

**Fig. S4** mMDS of embedding after training of surrogate model at iteration 2. Circles denote unlabeled data, squares denote labeled data, and crosses denote queried data by K-Center



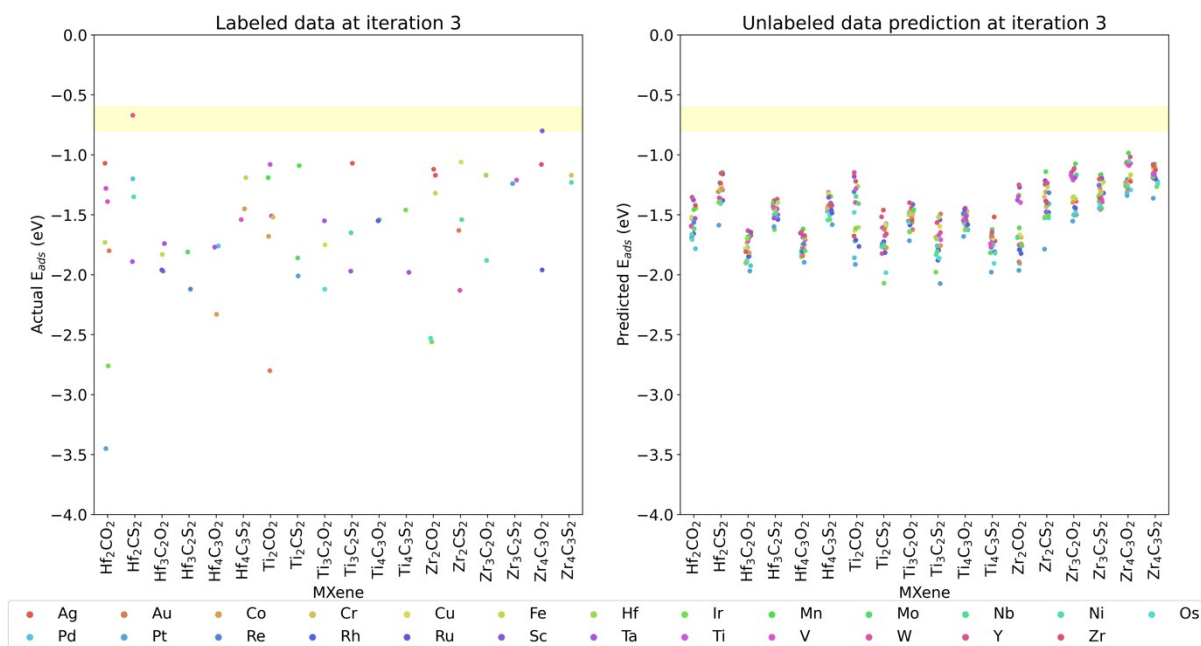

**Fig. S5** Actual adsorption energy of labeled datapoints and predicted adsorption energy of unlabeled datapoints at iteration 3. The yellow shaded area represents the target adsorption energy range of -0.6 to -0.8 eV.

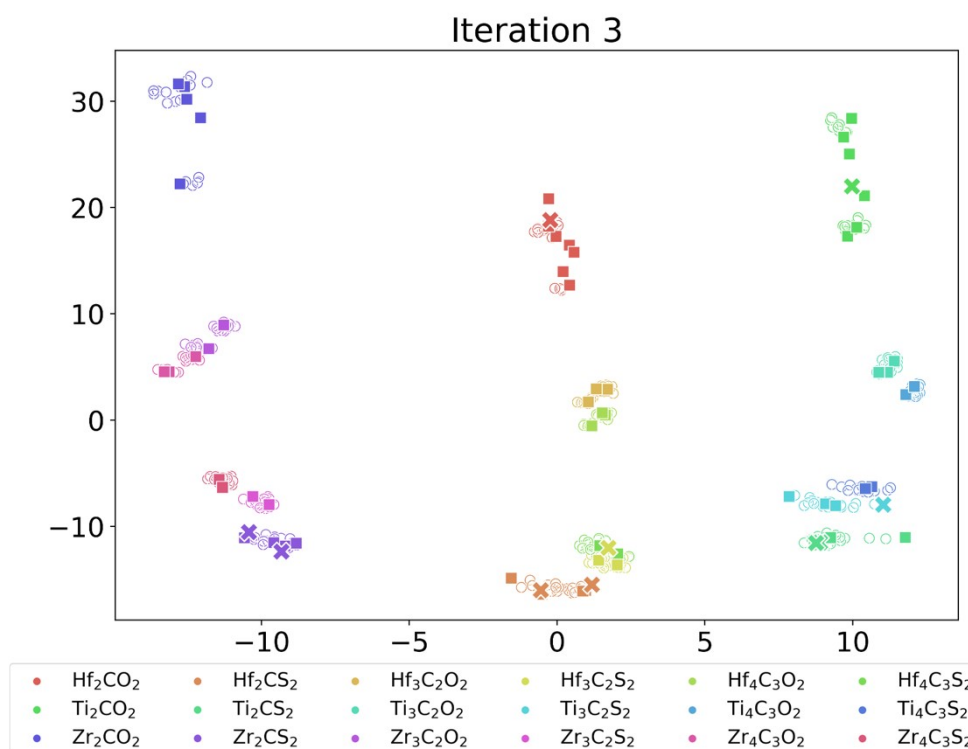

**Fig. S6** mMDS of embedding after training of surrogate model at iteration 3. Circles denote unlabeled data, squares denote labeled data, and crosses denote queried data by K-Center

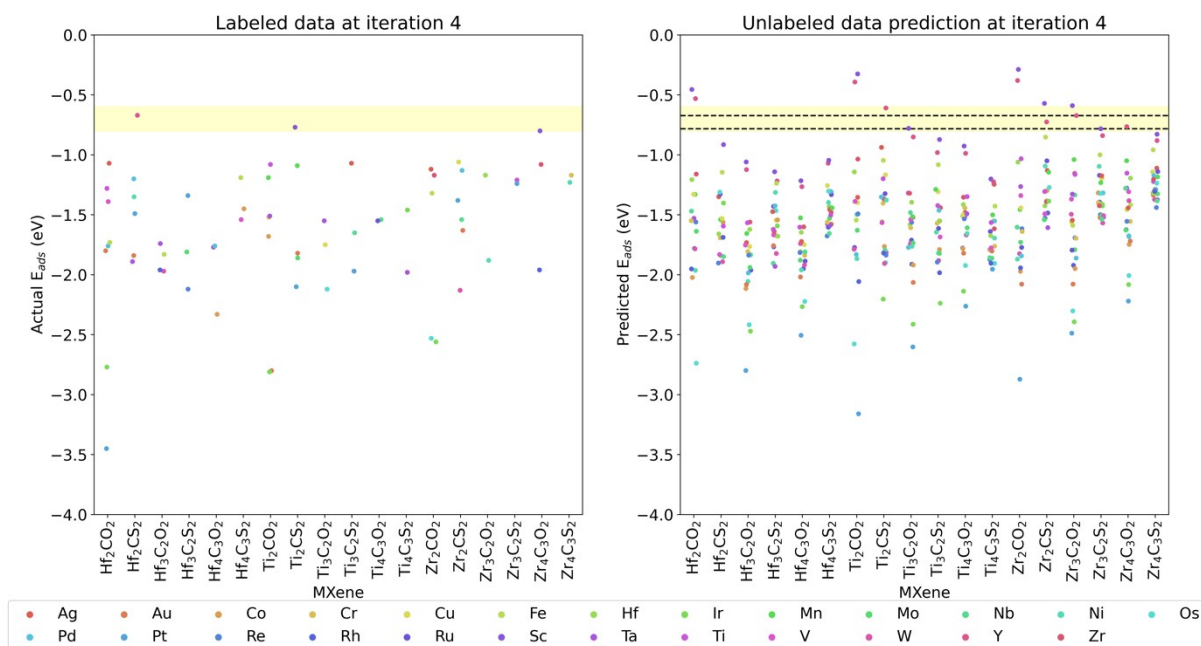

**Fig. S7** Actual adsorption energy of labeled datapoints and predicted adsorption energy of unlabeled datapoints at iteration 4. The yellow shaded area represents the target adsorption energy range of -0.6 to -0.8 eV. The dash lines denote the range of queried data by Greedy.

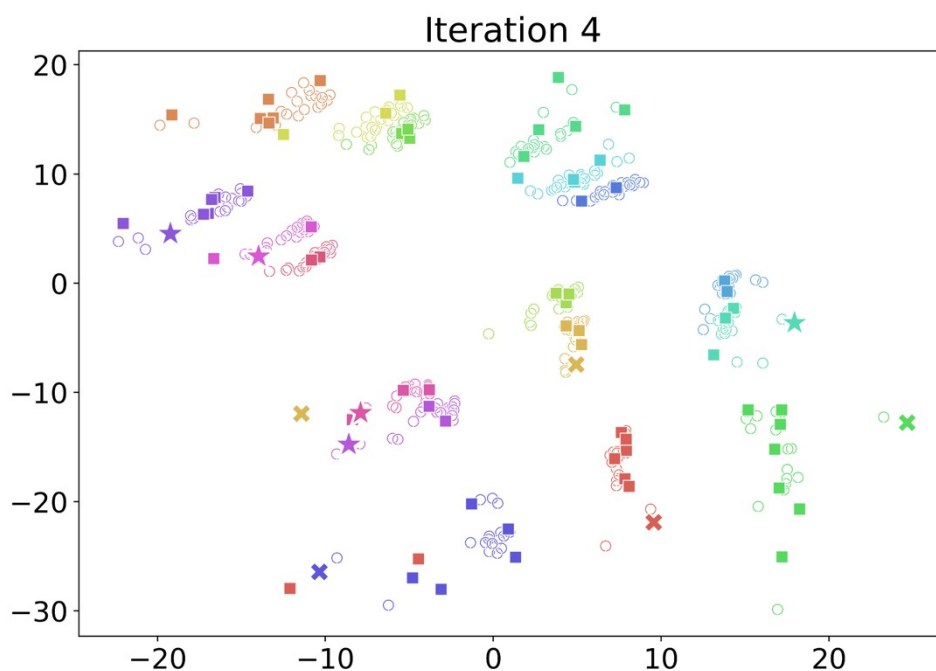

**Fig. S8** mMDS of embedding after training of surrogate model at iteration 4. Circles denote unlabeled data, squares denote labeled data, crosses denote queried data by K-Center, and stars denote queried data by Greedy.

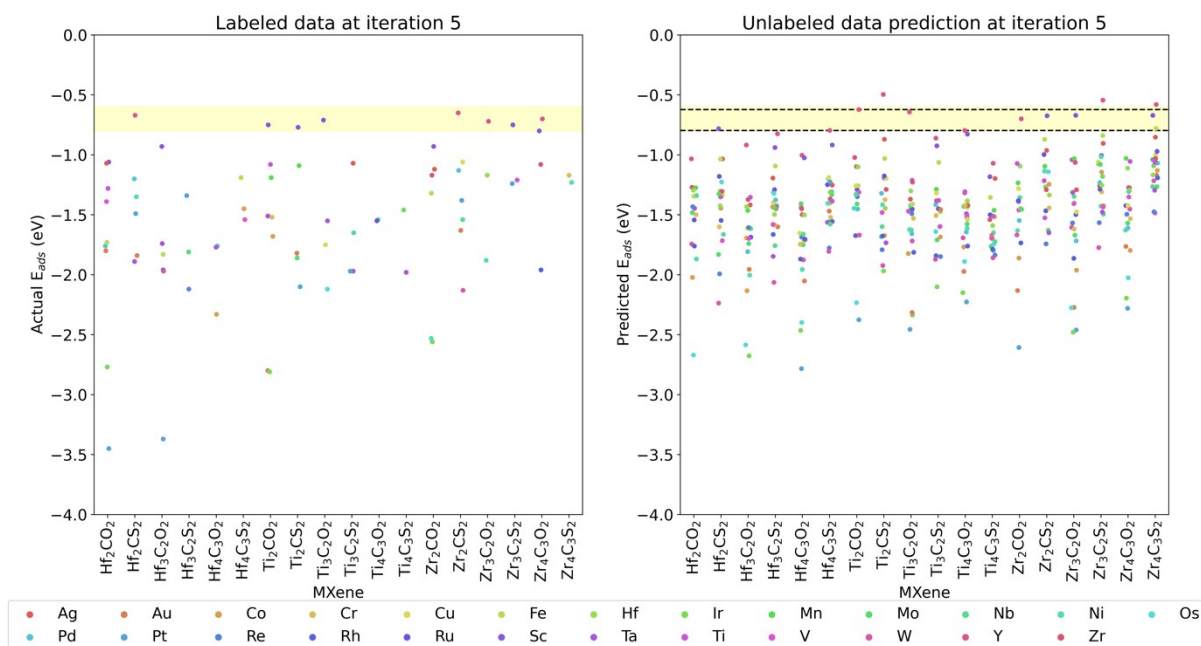

**Fig. S7** Actual adsorption energy of labeled datapoints and predicted adsorption energy of unlabeled datapoints at iteration 5. The yellow shaded area represents the target adsorption energy range of -0.6 to -0.8 eV. The dash lines denote the range of queried data by Greedy.

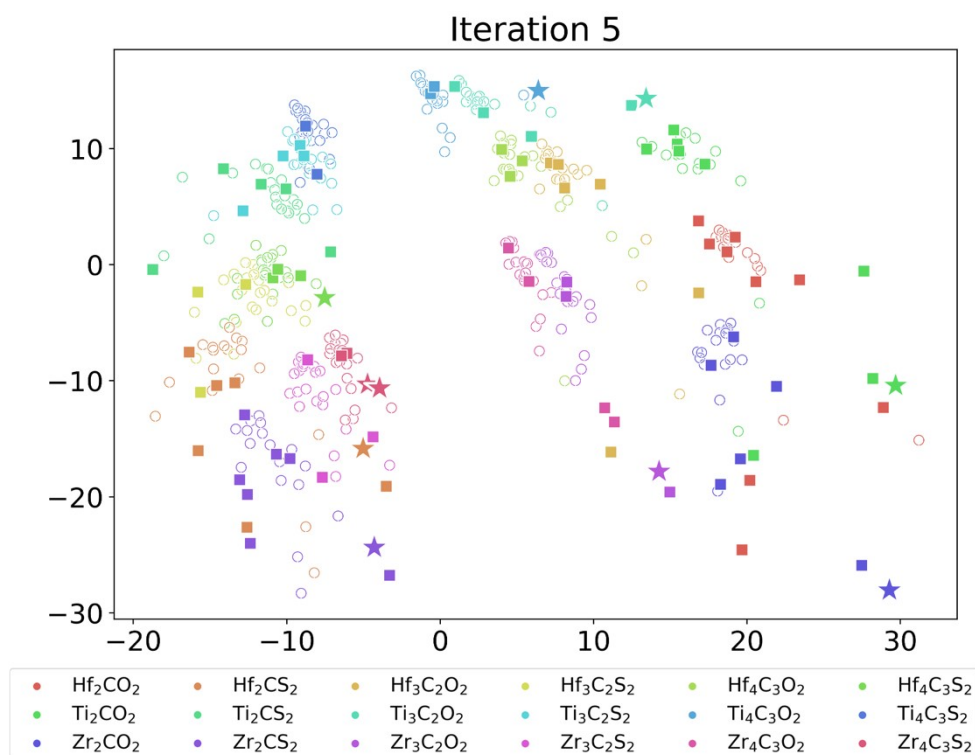

**Fig. S8** mMDS of embedding after training of surrogate model at iteration 5. Circles denote unlabeled data, squares denote labeled data, and stars denote queried data by Greedy.

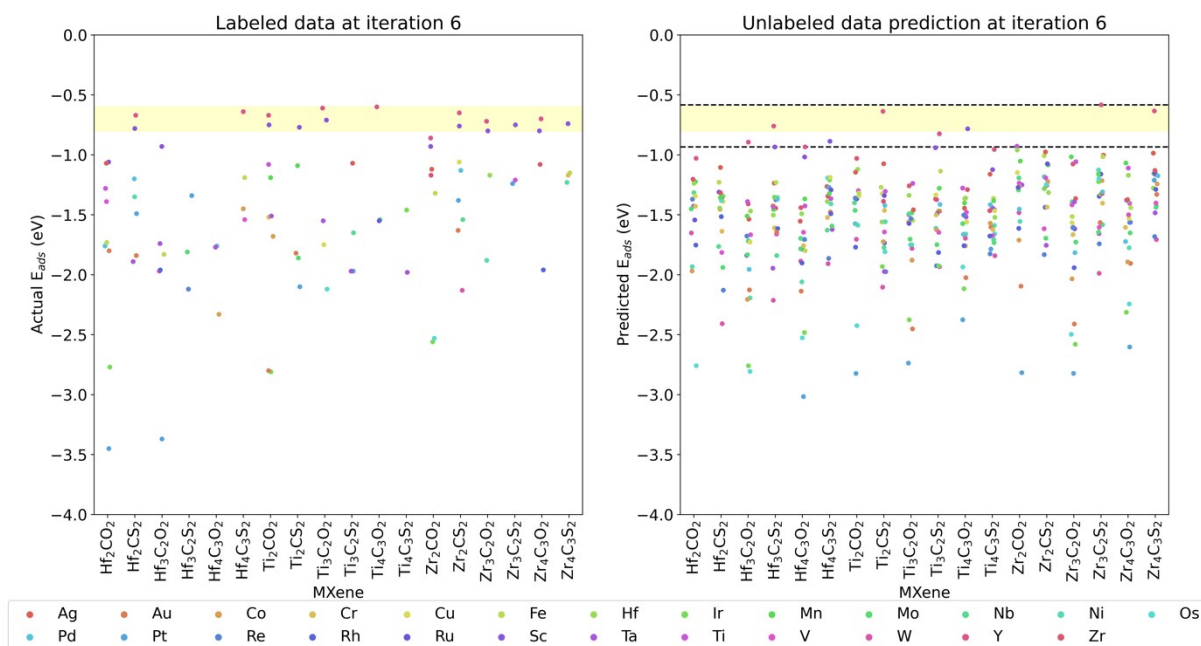

**Fig. S9** Actual adsorption energy of labeled datapoints and predicted adsorption energy of unlabeled datapoints at iteration 6. The yellow shaded area represents the target adsorption energy range of -0.6 to -0.8 eV. The dash lines denote the range of queried data by Greedy.

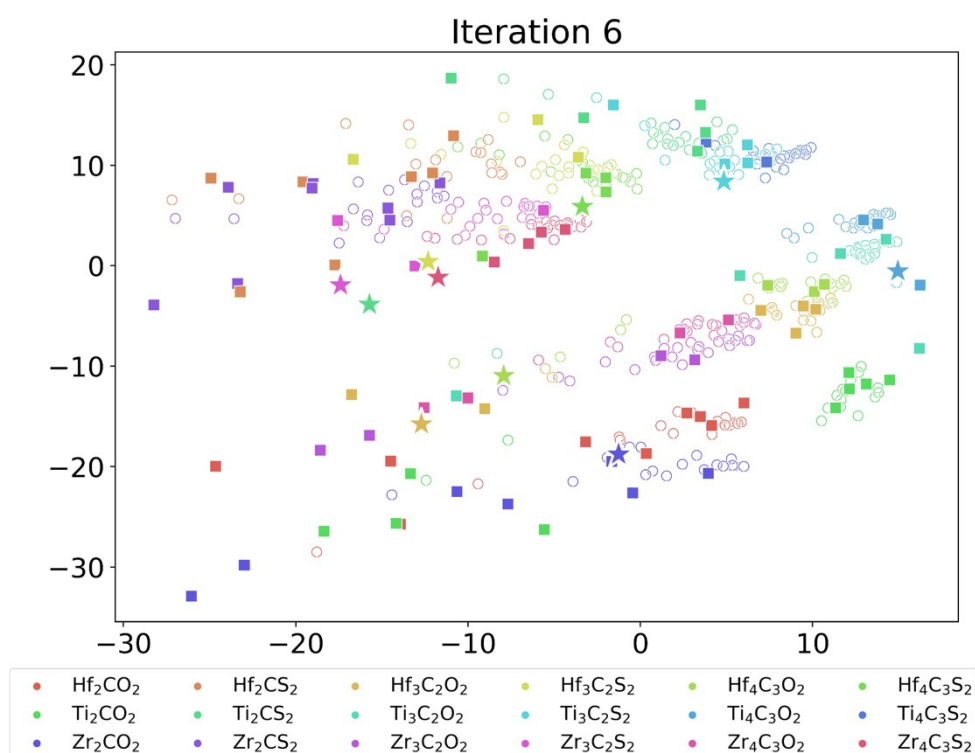

**Fig. S10** mMDS of embedding after training of surrogate model at iteration 6. Circles denote unlabeled data, squares denote labeled data, and stars denote queried data by Greedy.

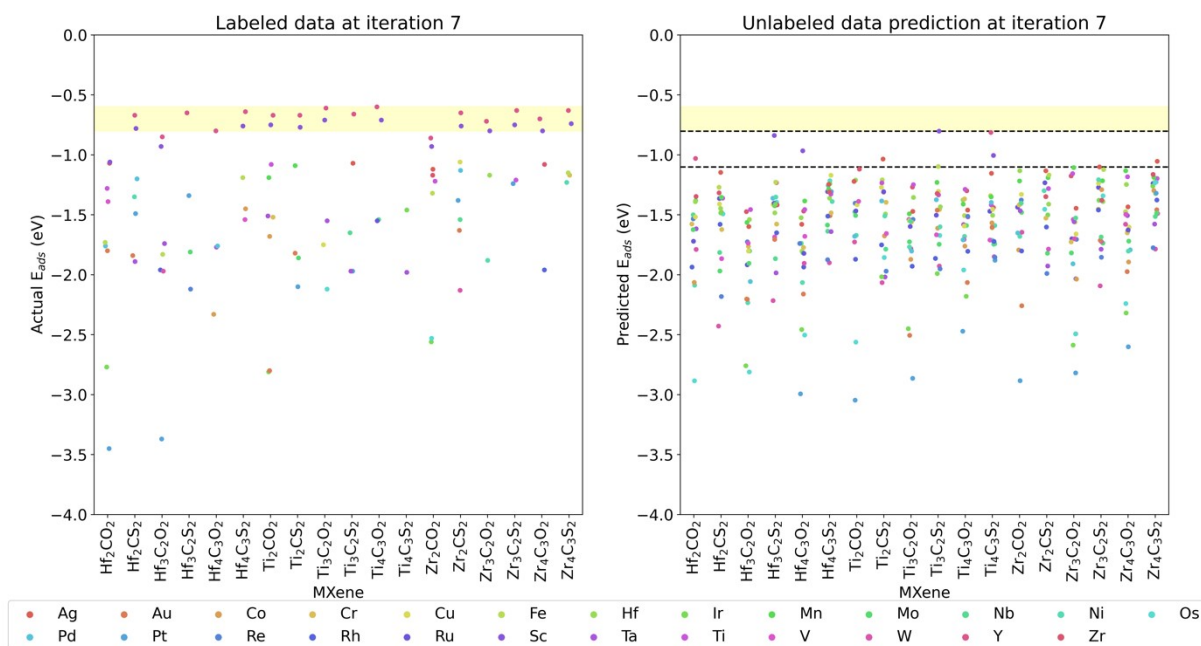

**Fig. S11** Actual adsorption energy of labeled datapoints and predicted adsorption energy of unlabeled datapoints at iteration 7. The yellow shaded area represents the target adsorption energy range of -0.6 to -0.8 eV. The dash lines denote the range of queried data by Greedy.

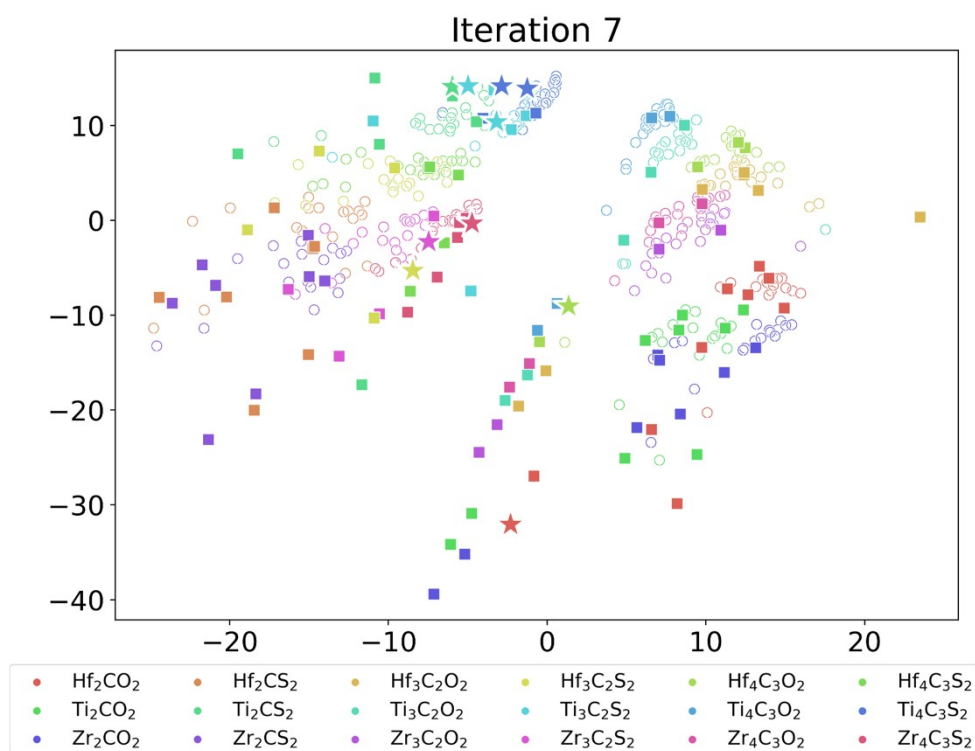

**Fig. S12** mMDS of embedding after training of surrogate model at iteration 7. Circles denote unlabeled data, squares denote labeled data, and stars denote queried data by Greedy.

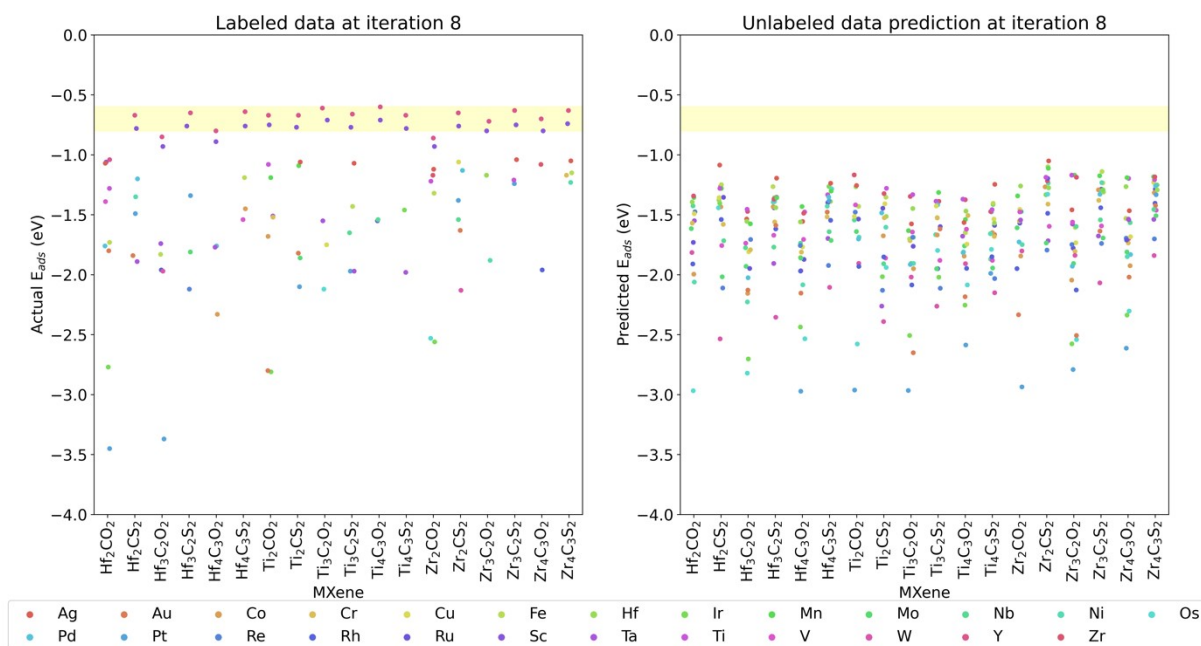

**Fig. S13** Actual adsorption energy of labeled datapoints and predicted adsorption energy of unlabeled datapoints at iteration 8. The yellow shaded area represents the target adsorption energy range of -0.6 to -0.8 eV.

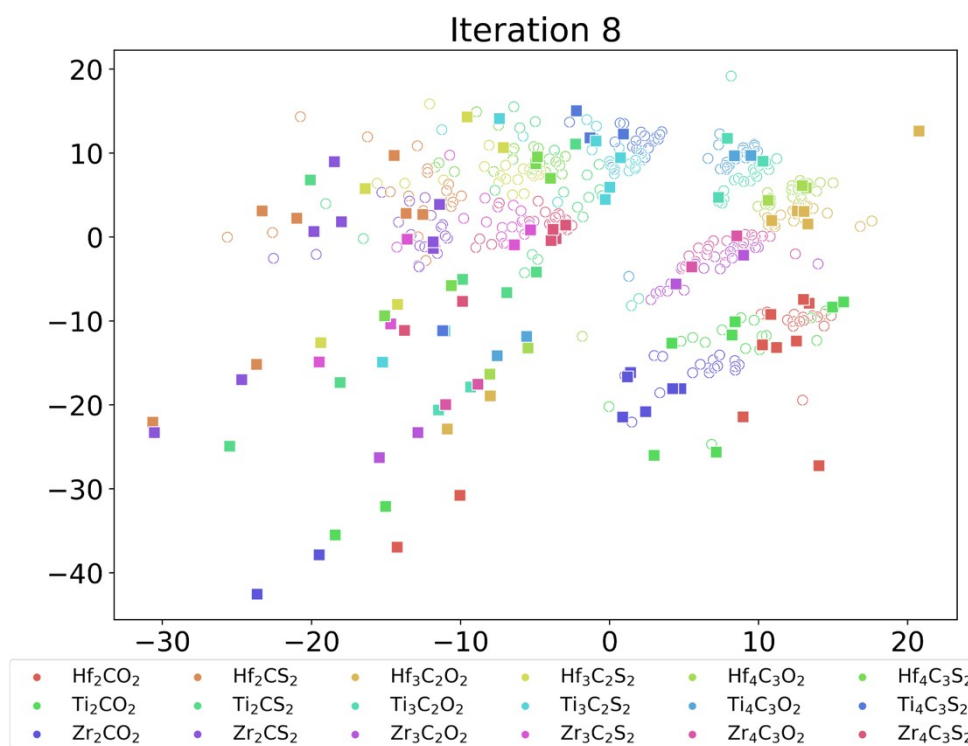

**Fig. S14** mMDS of embedding after training of surrogate model at iteration 8. Circles denote unlabeled data, and squares denote labeled data.



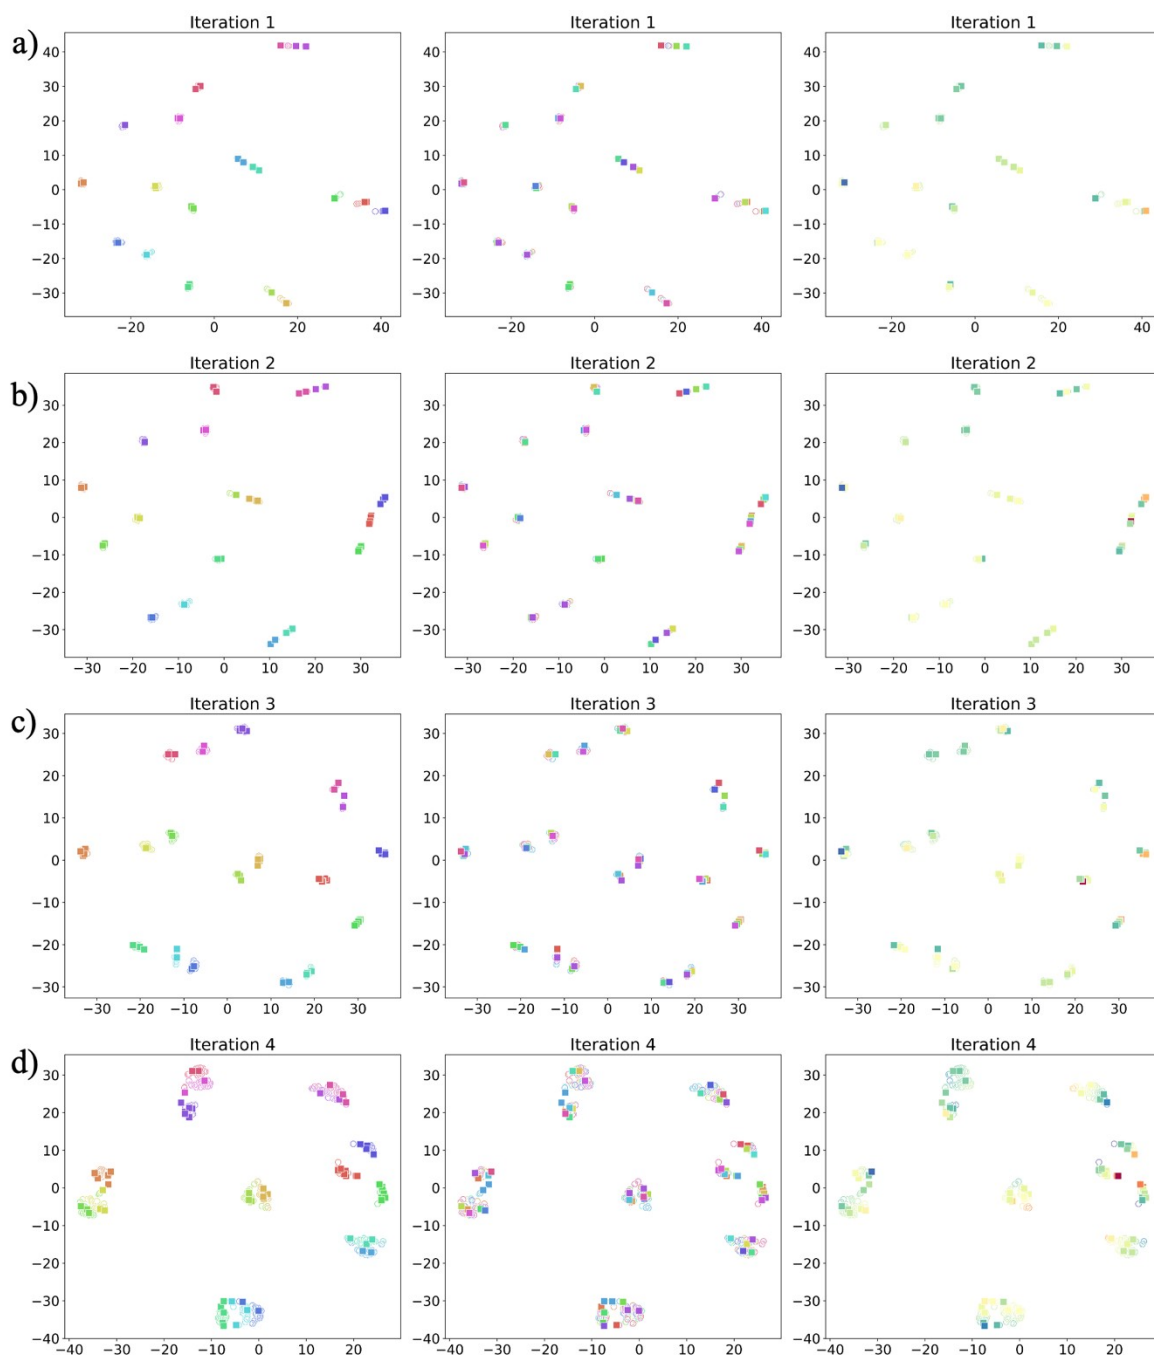

**Fig. S15** T TSNE of the embedding at iteration 1-4, **a-d** respectively. Colors are based on (Left) different surfaces. (Middle) different anchored metal. These two columns use the same color as the legends of **Fig. S1** and **S2** respectively. (Right) Colors represent the actual  $E_{ads}$  for labeled data and the predicted  $E_{ads}$  for unlabeled data, with lower  $E_{ads}$  color being red and higher  $E_{ads}$  being blue. Circles denote unlabeled data, and squares denote labeled data.

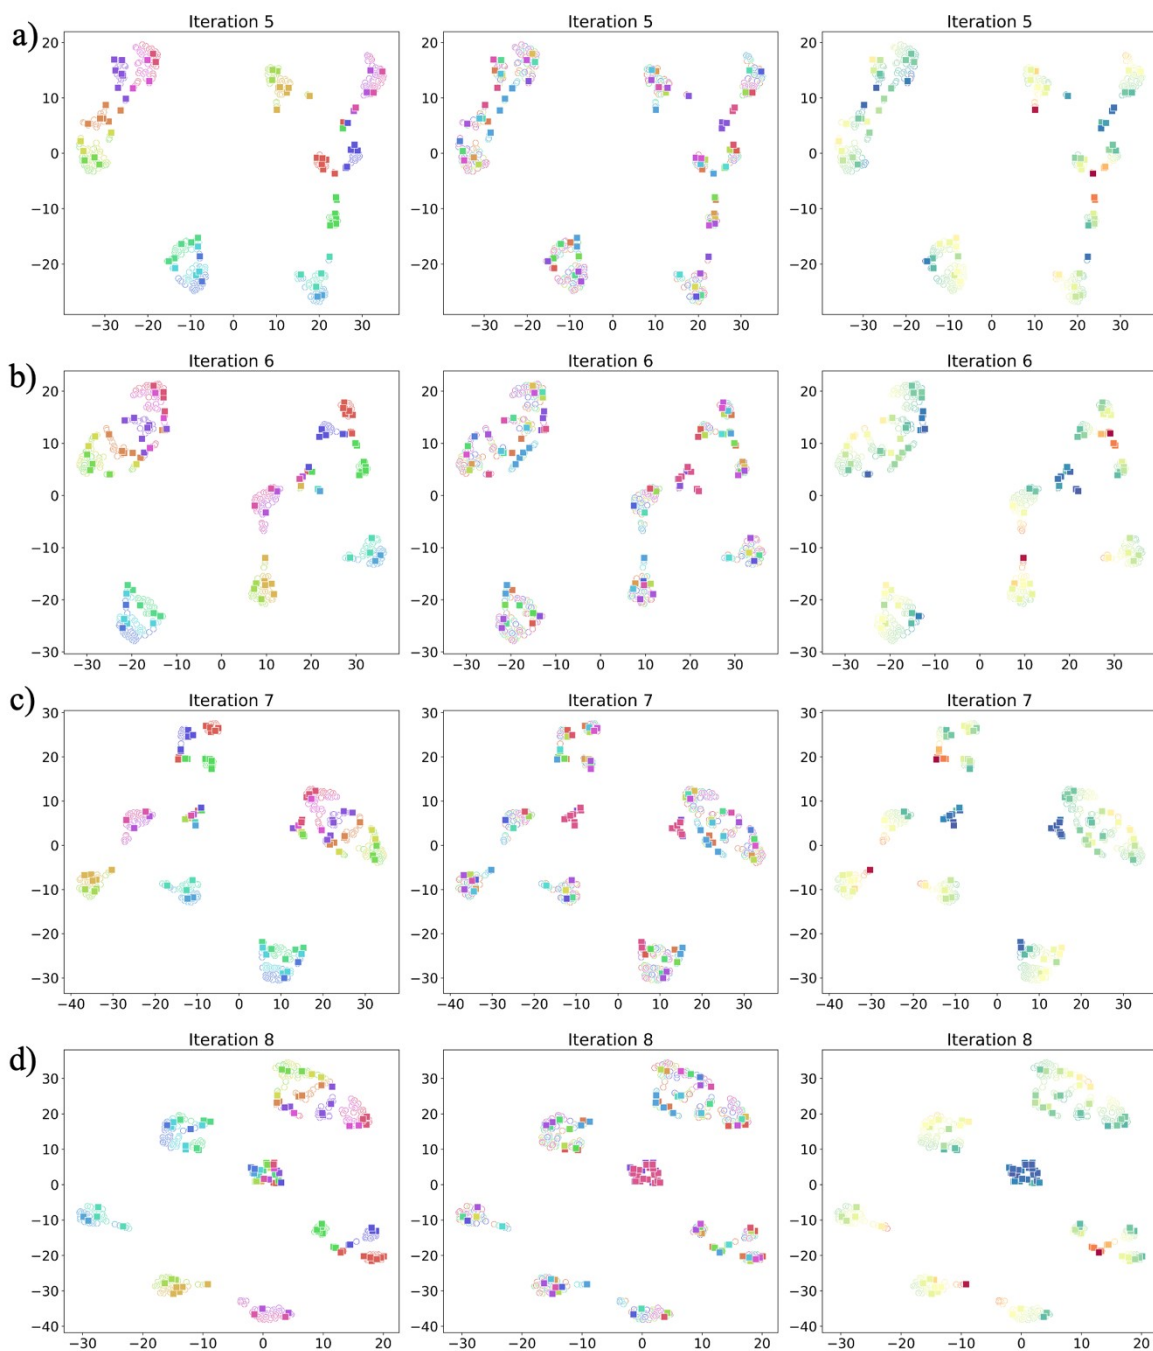

**Fig. S16** TSNE of the embedding at iteration 5-8, **a-d** respectively. Colors are based on (Left) different surfaces. (Middle) different anchored metal. These two columns use the same color as the legends of **Fig. S1** and **S2** respectively. (Right) Colors represent the actual  $E_{ads}$  for labeled data and the predicted  $E_{ads}$  for unlabeled data, with lower  $E_{ads}$  color being red and higher  $E_{ads}$  being blue. Circles denote unlabeled data, and squares denote labeled data.



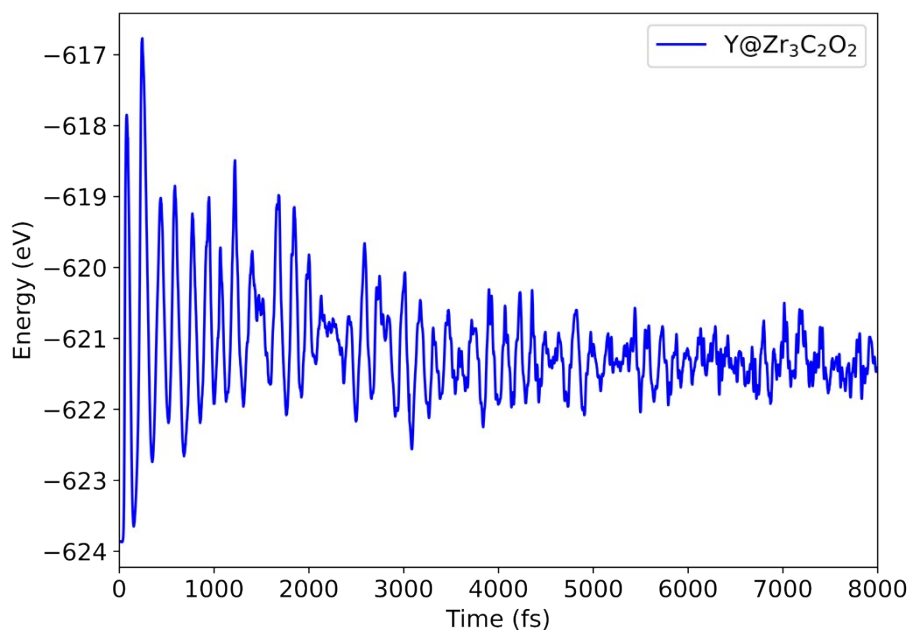

**Fig. S17** Energy fluctuation of CO adsorbed on  $\text{Y@Zr}_3\text{C}_2\text{O}_2$  from AIMD simulation at the temperature of 300 K for 8 ps with a time step of 2 fs. The total simulation consists of 2 ps for the equilibration period and 6 ps for the production period.

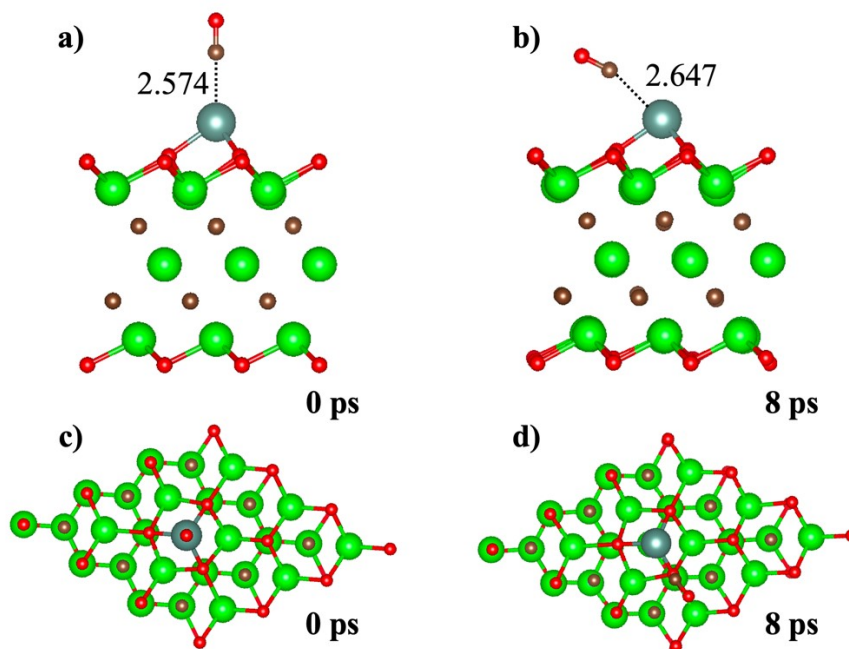

**Fig. S18** Snapshot of initial and final structure from AIMD simulation of CO adsorbed on  $\text{Y@Zr}_3\text{C}_2\text{O}_2$ . (a-b) side views at 0 and 8 ps (c-d) top views at 0 and 8 ps. The distance between Y and C atoms are represented in angstrom.

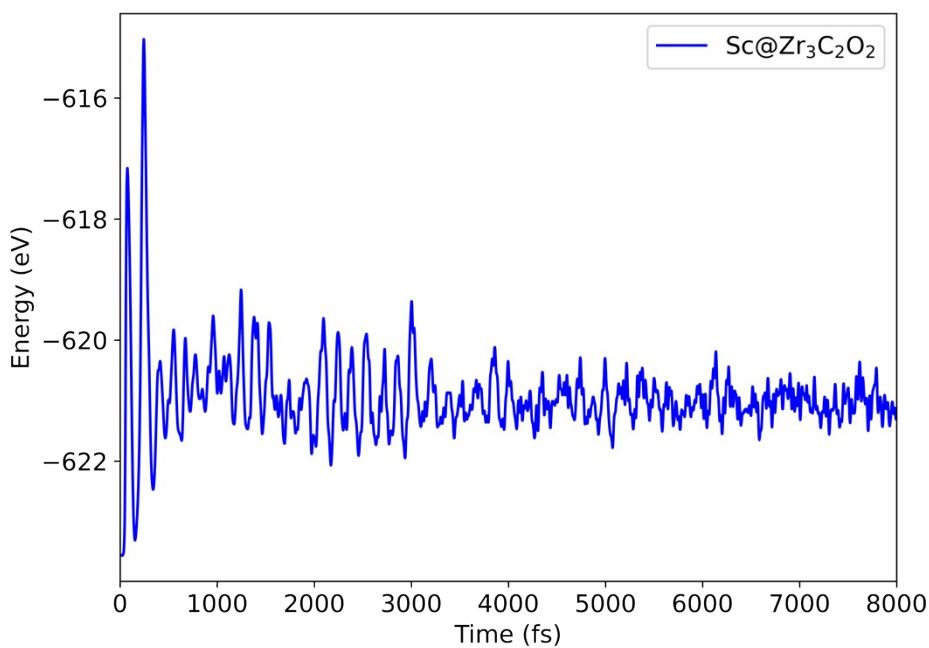

**Fig. S19** Energy fluctuation of CO adsorbed on Sc@Zr<sub>3</sub>C<sub>2</sub>O<sub>2</sub> from AIMD simulation at the temperature of 300 K for 8 ps with a time step of 2 fs. The total simulation consists of 2 ps for the equilibration period and 6 ps for the production period.

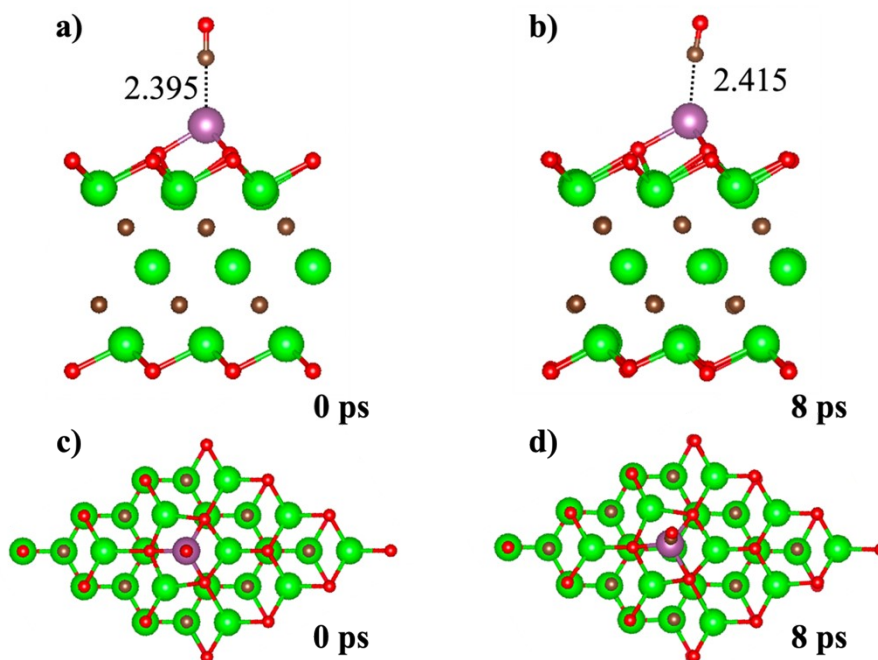

**Fig. S20** Snapshot of initial and final structure from AIMD simulation of CO adsorbed on Sc@Zr<sub>3</sub>C<sub>2</sub>O<sub>2</sub>. (a-b) side views at 0 and 8 ps (c-d) top views at 0 and 8 ps. The distance between Sc and C atoms are represented in angstrom.
